# Supplementary material for: Diversity of Structural, Dynamic, and Environmental Effects Explain a Distinctive Functional Role of Transmembrane Domains in the Insulin Receptor Subfamily
Source: MDPI journal article supplement (doi:10.3390/ijms24043906), 2023-02-15
Supplement: s1 [file s1 › ijms-2168036-supplementary.pdf]

# Supplementary Data

## Diversity of Structural, Dynamic, and Environmental Effects Explain a Distinctive Functional Role of Transmembrane Domains in the Insulin Receptor Subfamily

Yaroslav V. Bershatsky <sup>1,2,†</sup>, Andrey S. Kuznetsov <sup>1,†</sup>, Aisha R. Idiatullina <sup>2</sup>, Olga V. Bocharova <sup>1</sup>, Sofya M. Dolotova <sup>1,2</sup>, Alina A. Gavrilenkova <sup>1,2</sup>, Oxana V. Serova <sup>1</sup>, Igor E. Deyev <sup>1</sup>, Tatiana V. Rakitina <sup>1</sup>, Olga T. Zangieva <sup>3</sup>, Konstantin V. Pavlov <sup>1,4</sup>, Oleg V. Batishchev <sup>2,5</sup>, Vladimir V. Britikov <sup>6</sup>, Sergey A. Usanov <sup>6</sup>, Alexander S. Arseniev <sup>1,2</sup>, Roman G. Efremov <sup>1,2,7</sup> and Eduard V. Bocharov <sup>1,2,\*</sup>

<sup>1</sup> Shemyakin–Ovchinnikov Institute of Bioorganic Chemistry, Russian Academy of Sciences, Moscow 117997, Russia

<sup>2</sup> Moscow Institute of Physics and Technology, Dolgoprudny 141700, Russia

<sup>3</sup> Federal State Budgetary Institution “National Medical and Surgical Center named after N.I. Pirogov”, Moscow 105203, Russia

<sup>4</sup> Federal Clinical Center of Physical-Chemical Medicine of FMBA, Moscow 119435, Russia

<sup>5</sup> Frumkin Institute of Physical Chemistry and Electrochemistry of Russian Academy of Sciences, Moscow 119071, Russia

<sup>6</sup> Institute of Bioorganic Chemistry, National Academy of Sciences of Belarus, 220141 Minsk, Belarus

<sup>7</sup> Department of Applied Mathematics, National Research University Higher School of Economics, Moscow 101000, Russia

\* Correspondence: edvbon@mail.ru

† These authors contributed equally to this work.

**Table S1. Structural statistics for the ensemble of 20 best NMR structures of the InsRtm, IGF1Rtm and IRRtm monomers.**

| <b>NMR distance and dihedral restraints</b>                                                                     | <b>InsRtm</b>   | <b>IGF1Rtm</b>  | <b>IRRtm</b>    |
|-----------------------------------------------------------------------------------------------------------------|-----------------|-----------------|-----------------|
| Total unambiguous NOE restraints                                                                                | 274             | 274             | 204             |
| Intraresidue                                                                                                    | 89              | 83              | 61              |
| Inter-residue                                                                                                   | 185             | 191             | 143             |
| Sequential, $ i - j  = 1$                                                                                       | 62              | 60              | 42              |
| Short-range, $ i - j  \leq 1$                                                                                   | 151             | 143             | 103             |
| Medium range, $1 <  i - j  \leq 4$                                                                              | 123             | 131             | 101             |
| Long range, $ i - j  > 4$                                                                                       | 0               | 0               | 0               |
| Hydrogen bond restraints (upper/lower)                                                                          | 51/51           | 45/45           | 45/45           |
| Total torsion angle restraints                                                                                  | 57              | 71              | 56              |
| Backbone $\phi$                                                                                                 | 26              | 29              | 25              |
| Backbone $\psi$                                                                                                 | 27              | 20              | 26              |
| Side chain $\chi^1$                                                                                             | 4               | 12              | 5               |
| <b>Structure calculation statistics</b>                                                                         |                 |                 |                 |
| CYANA target function, $\text{\AA}^2$                                                                           | $0.29 \pm 0.09$ | $0.56 \pm 0.13$ | $0.37 \pm 0.12$ |
| Restraint violations                                                                                            |                 |                 |                 |
| Distance ( $>0.3 \text{ \AA}$ )                                                                                 | 0               | 0               | 0               |
| Dihedral ( $>5^\circ$ )                                                                                         | 0               | 0               | 0               |
| Average pairwise RMSD <sup>a</sup> , $\text{\AA}$ , overall TMD $\alpha$ -helical region                        |                 |                 |                 |
| Backbone atoms                                                                                                  | $0.51 \pm 0.18$ | $0.49 \pm 0.19$ | $2.19 \pm 0.68$ |
| All heavy atoms                                                                                                 | $1.11 \pm 0.20$ | $1.06 \pm 0.16$ | $2.80 \pm 0.75$ |
| Average pairwise RMSD <sup>a</sup> , $\text{\AA}$ , stable $\alpha$ -helical region after intramembrane proline |                 |                 |                 |
| Backbone atoms                                                                                                  | $0.22 \pm 0.10$ | $0.24 \pm 0.08$ | $0.45 \pm 0.17$ |
| All heavy atoms                                                                                                 | $0.66 \pm 0.16$ | $0.77 \pm 0.21$ | $1.06 \pm 0.20$ |
| Ramachandran analysis <sup>b</sup>                                                                              |                 |                 |                 |
| Residues in most favored regions, %                                                                             | 96.7            | 98.1            | 96.2            |
| Residues in additional allowed regions, %                                                                       | 2.9             | 1.9             | 3.8             |
| Residues in generously allowed regions, %                                                                       | 0.4             | 0.0             | 0.0             |
| Residues in disallowed regions, %                                                                               | 0.0             | 0.0             | 0.0             |

<sup>a</sup> Root mean square deviation.

<sup>b</sup> Ramachandran statistics were determined using CYANA.

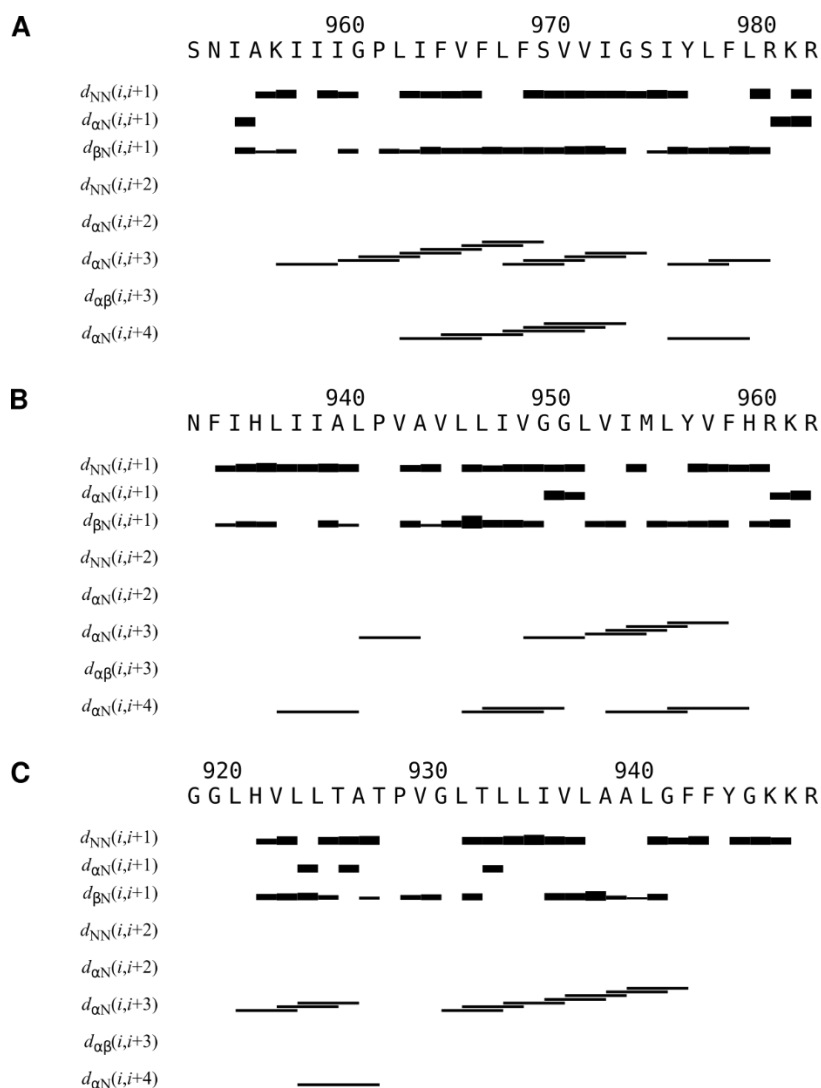

**Figure S1. NMR data for the InsRtm, IGF1Rtm, and IRRtm monomers in a membrane-mimicking environment.** Intramonomeric sequential and medium range NOE connectivity observed in 3D  $^{15}\text{N}$ -edited NOESY-HSQC spectra (80 ms mixing time) are shown for InsRtm (A), IGF1Rtm (B) and IRRtm (C), respectively, by horizontal lines. The line thickness for the NOE connectivity is inversely proportional to the squared upper distance bound. The NOE information on some regions was restricted due to cross-peak broadening and overlapping.
